1  
2  
3  
4  
5  
6  
7  
8  
9  
10  
11  
12  
13  
14  
15  
16  
17  
18

# Novel 10-channel phased-array coil design for carotid wall MRI at 3T

Matthijs H.S. de Buck<sup>1</sup>, Peter Jezzard<sup>1</sup>, Robert Frost<sup>1,2,3</sup>, Chris Randell<sup>4</sup>, Katherine Hurst<sup>5</sup>,  
Robin P. Choudhury<sup>6</sup>, Matthew D. Robson<sup>7,8</sup>, Luca Biasioli<sup>6,7</sup>

<sup>1</sup>Wellcome Centre for Integrative Neuroimaging, FMRIB Division, Nuffield Department of Clinical Neurosciences, University of Oxford, UK

<sup>2</sup>Athinoula A. Martinos Center for Biomedical Imaging, Massachusetts General Hospital, Charlestown, MA, USA

<sup>3</sup>Department of Radiology, Harvard Medical School, Boston, MA, USA

<sup>4</sup>PulseTeq Limited, Chobham, UK

<sup>5</sup>Nuffield Department of Surgical Sciences, University of Oxford, UK

<sup>6</sup>Acute Vascular Imaging Centre, Division of Cardiovascular Medicine, Radcliffe Department of Medicine, University of Oxford, UK

<sup>7</sup>Oxford Centre for Clinical Magnetic Resonance Research, Division of Cardiovascular Medicine, Radcliffe Department of Medicine, University of Oxford, UK

<sup>8</sup>Perspectum, Gemini One, John Smith Drive, Oxford, UK

## Corresponding author:

Luca Biasioli; [luca.biasioli@cardiov.ox.ac.uk](mailto:luca.biasioli@cardiov.ox.ac.uk)

## 19 Abstract

20 **Background:** Accurate assessment of plaque accumulation near the carotid bifurcation is  
21 important for the effective prevention and treatment of stroke. However, vessel and plaque  
22 delineation using MRI can be limited by low contrast-to-noise ratio (CNR) and long  
23 acquisition times. In this work, a novel 10-channel phased-array receive coil design for  
24 bilateral imaging of the carotid bifurcation using 3T MRI is proposed.

25 **Methods:** The novel 10-channel receive coil was compared to a commercial 4-channel  
26 receive coil configuration using data acquired from phantoms and healthy volunteers (N =  
27 9). The relative performance of the coils was assessed, by comparing signal-to-noise ratio  
28 (SNR), g-factor noise amplification, and the CNR between vessel wall and lumen using black-  
29 blood sequences. Patient data were acquired from 12 atherosclerotic carotid artery disease  
30 patients.

31 **Results:** The 10-channel coil consistently provided substantially increased SNR in phantoms  
32 ( $+88 \pm 2\%$ ) and improved CNR in healthy carotid arteries ( $+62 \pm 11\%$ ), or reduced g-factor  
33 noise amplification. Patient data showed excellent delineation of atherosclerotic plaque  
34 along the length of the carotid bifurcation using the 10-channel coil.

35 **Conclusions:** The proposed 10-channel coil design allows for improved visualization of the  
36 carotid arteries and the carotid bifurcation and increased parallel imaging acceleration  
37 factors.

38

### 39 **Keywords:**

40 Carotid bifurcation; Parallel imaging; Coil design; Vessel wall imaging; Atherosclerotic plaque  
41 imaging; T2 mapping

42 **Abbreviations**

43 CNR = contrast-to-noise Ratio; DANTE = delay alternating with nutation for tailored  
44 Excitation; FSE = fast spin echo; g-factor = geometry factor; GRAPPA = generalized  
45 autocalibrating partially parallel acquisition, MESE = multi-echo spin echo; MRA = magnetic  
46 resonance angiography; MRI = magnetic resonance imaging; RF = radiofrequency; SD =  
47 standard deviation; SENSE = sensitivity encoding; SNR = signal-to-noise ratio; TOF = time-of-  
48 flight; TR/TE = repetition time/echo time

## 1. Introduction

49  
50  
51  
52  
53  
54  
55  
56  
57  
58  
59  
60  
61  
62  
63  
64  
65  
66  
67  
68  
69  
70  
71

Atherosclerosis in the carotid arteries is one of the leading causes of stroke<sup>1-4</sup>, with the majority of plaque accumulation occurring near the carotid bifurcation. Accurate assessment of the size, shape, location, and composition of atherosclerotic plaques<sup>1,3,5</sup> is important for the effective diagnosis and treatment of the disease and the prevention of ischaemic events.

Magnetic resonance imaging (MRI) can be used for non-invasive *in vivo* characterization of atherosclerotic plaque in the carotid arteries<sup>5-7</sup>. The different contrast weightings in MRI facilitate a comprehensive characterization of the vessel wall and the plaque<sup>8-11</sup>, as well as visualization of the arterial blood flow. Accurate MRI assessment of plaque size and composition, which are indicative of plaque vulnerability<sup>2,12</sup>, is constrained by the carotid image resolution and signal-to-noise ratio (SNR) that can be achieved within a clinically reasonable scan time.

Moreover, plaque lipid can be accurately quantified by T2 mapping on a voxel-by-voxel basis, as demonstrated in endarterectomy patients by histological validation<sup>7,11,13,14</sup>. This MRI technique can be used to study the relationship between plaque lipid content and symptomatic status, and to identify patients at higher risk of plaque rupture. However, it requires sufficient SNR in multiple spin echo images at different echo times to generate robust T2 estimates for each plaque voxel, thus it would clearly benefit from increased coil sensitivity at carotid depth.

72 The carotid bifurcation is located in a relatively superficial part of the neck, at a typical  
73 depth of 3 cm below the skin<sup>15-17</sup>, albeit deeper in overweight patients, who are at higher  
74 risk of atherosclerotic complications. Both the longitudinal location (here longitudinal is  
75 defined as the location along the vessel in the head-foot direction) and the depth of the  
76 carotid bifurcation can vary substantially among subjects due to physical differences in neck  
77 and vascular anatomy. This means that an effective MR receive coil for imaging near the  
78 carotid bifurcation requires high SNR at a sufficiently large penetration depth and  
79 longitudinal coverage in order to accommodate a wide range of anatomies.

80

81 In addition to high SNR, accurate carotid plaque characterization requires high-resolution  
82 images to accurately visualize the detailed (<0.5 mm) features of the plaque composition.  
83 Parallel imaging techniques<sup>18</sup> are often used to acquire data at high resolutions with  
84 reduced scan times, at the cost of a loss in SNR. The relative loss of SNR can further degrade  
85 depending on the coil geometry being used<sup>19</sup>, so coil configurations which provide low  
86 amounts of noise amplification at high acceleration factors are desirable for carotid MRI<sup>20,21</sup>.

87

88 The advantages of phased-array coils for carotid artery imaging have been established by  
89 Hayes et al.<sup>22</sup>. For imaging near the carotid bifurcation at 3T, which is recommended over  
90 1.5T in clinical practice because of its increased SNR<sup>10</sup> and high clinical availability, various  
91 studies into the optimal coil configurations are available<sup>15,17,20,23-26</sup>. Those studies at 3T use  
92 between 4 and 16 coil channels for bilateral imaging. 30-channel coils for carotid MRI have  
93 been shown to facilitate high parallel imaging acceleration factors, but with limited SNR  
94 penetration<sup>20,27</sup>.

95

96 Coil configurations consisting of few but large receive elements typically benefit from large  
97 spatial coverage, but with limited SNR<sup>17,20</sup>. Increased numbers of small coil channels can  
98 provide improved superficial SNR, but with reduced penetration depth and flexibility<sup>20,26</sup>. In  
99 this work, a new 10-channel coil configuration for accurate bilateral visualization of the  
100 carotid bifurcation using parallel imaging acceleration is proposed. The achieved SNR, noise  
101 amplification, and vessel visualization using this coil is compared to results obtained using a  
102 commercial 4-channel carotid coil for phantom and *in-vivo* acquisitions. In a recent paper,  
103 Zhang et al.<sup>20</sup> compare the performance of three different (6-, 8-, and 30-channel) carotid  
104 coil designs to the performance of the same commercial 4-channel coil which is used in this  
105 study. Therefore, the performance of the 10-channel coil proposed here relative to the 4-  
106 channel coil can be compared to their results to put the performance of the 10-channel coil  
107 into the context of those other designs.

108

109

## 2. Methods

110

### 2.1 Coil design

111 All data were acquired using a newly developed 10-channel phased-array receive coil  
112 (PulseTeq, Chobham, United Kingdom) and compared to results obtained from a widely  
113 used commercial 4-channel phased-array receive coil (MachNet BV, Roden, The  
114 Netherlands). The measurement setups using both coils are shown in Figure 1. Both coils  
115 were designed for bilateral imaging of the carotid arteries near the carotid bifurcation.

116

117 The 4-channel coil consists of two bilateral sets of paired transverse channels. The 10-  
118 channel surface coil consists of two sets of octagonal elements with custom-made low-

119 impedance preamplifiers, positioned in an ‘Olympic ring’-configuration (Figure 1c). Each side  
120 of the coil (overall dimension = 130 × 90 mm) is made of 5 elements of size = 45 mm with  
121 both active and passive protection. The coils were designed to be flexible and adaptable to  
122 different neck sizes, and are mounted on support arms that can bend and rotate for  
123 improved positioning with respect to the carotid bifurcation while maintaining high patient  
124 comfort. The coils are surrounded by foam covers to ensure optimal patient comfort and  
125 adequate isolation.

126

127 *Figure 1: The two coils used in this work. (a): The 4-channel coil positioned around the neck of a volunteer. (b):*  
128 *The 10-channel coil positioned around the neck of a (different) volunteer. The green arrows indicate the degrees*  
129 *of freedom of the coil positioning around the neck of the subject. (c-d) Relative positions and dimensions of 4-*  
130 *channel<sup>20</sup> and 10-channel coils and their individual channels (figures show one of the bilateral sides).*

131

## 132 **2.2 Phantom study**

133 Data from a cylindrical short T1 phantom (15 cm diameter) were acquired for quantitative  
134 comparison of the relative performance of the two coils.

135

136 A single-slice spin-echo sequence was used for SNR measurements (TR/TE = 300ms/10ms,  
137 resolution 1.2×1.2×3.0mm, matrix size 256×256, total scan time 3:32 minutes). The same  
138 slice was scanned 6 times with 10 second pauses for temporal SNR (tSNR) calculations,  
139 assuming negligible motion and scanner drift.

140

141 Multi-slice T1-weighted turbo-spin-echo data were acquired for estimation of phantom g-  
142 factor maps of both coils in both coronal (10 slices) and transverse (20 slices) scan

143 orientations. Sequence parameters: TR/TE = 1000/13ms, resolution 0.9×0.9×2.0mm, in-  
144 plane matrix size 256×256, 100% slice gap, turbo factor 10. Total scan time was 1:21 and  
145 1:50 minutes for the coronal and transverse orientations, respectively.

146

### 147 **2.3 In vivo study**

148 Nine healthy volunteers (mean ± SD in age and weight: 33.2 ± 7.0 years; 78 ± 5 kg) were  
149 imaged with both the 4- and 10-channel coils on a Siemens (Erlangen, Germany) Verio 3T  
150 scanner using the DANTE-MESE sequence<sup>11,28</sup> to acquire 5 transverse slices over 10 cm  
151 centered at the carotid bifurcation and estimate T2 maps of the arterial wall. The following  
152 Multi-Echo Spin-Echo (MESE) acquisition parameters were used: 14 echoes (TE = 9.1 to 127.4  
153 ms), TR = 2000 ms, FOV = 128 × 128 × 100 mm, matrix size = 192 × 192, voxel size 0.67 × 0.67  
154 × 2 mm, slice gap = 100%, scan time 4 min. A Delay Alternating with Nutation for Tailored  
155 Excitation (DANTE<sup>29</sup>) preparation before each readout was used for flowing blood signal  
156 suppression. The following DANTE parameters were used: gradient amplitude = 18 mT/m,  
157 120 RF pulses, flip angle = 8°, RF pulse interval = 500 μs. Bright-blood Time-of-Flight (TOF) MR  
158 Angiography (MRA) was acquired to localize carotid bifurcations. Additional multi-slice T1-  
159 weighted turbo-spin-echo data were acquired in one healthy volunteer for the estimation of  
160 *in vivo* g-factor maps. 12 transverse slices were acquired with TR/TE = 1090ms/13.1ms,  
161 resolution 0.6 × 0.6 × 2.0 mm, in-plane matrix size 256×252, 100% slice gap, turbo factor 7,  
162 total scan time 2:41 minutes. Data were acquired under an agreed technical development  
163 protocol approved by the Oxford University Clinical Trials and Research Governance office, in  
164 accordance with International Electrotechnical Commission and UK Health Protection Agency  
165 guidelines.

166



167 12 patients with atherosclerosis ( $72.3 \pm 9.4$  years,  $80.6 \pm 11.7$  kg) were scanned at carotid  
168 plaque locations using slices perpendicular to the direction of the vessel with the 10-channel  
169 coil using DANTE-FSE (Fast Spin Echo) T1-weighted imaging. FSE acquisition parameters  
170 were TR = 1280 ms, TE = 13 ms, FOV =  $150 \times 150$  mm, matrix size  $256 \times 256$  ( $0.59 \times 0.59$  mm  
171 resolution), echo train length = 7, slice thickness = 2 mm, slice gap = 100%, scan time ~ 3  
172 min). DANTE preparation parameters were gradient amplitude = 18 mT/m, 64 RF pulses, flip  
173 angle =  $8^\circ$ , RF pulse interval = 1 ms. A bright-blood TOF MRA was acquired to localize carotid  
174 bifurcations and lumen stenoses. 13 interleaved T1-weighted slices were acquired at the  
175 level of the atherosclerotic plaques (affected carotid side based on Doppler Ultrasound).  
176 Ethical approval was obtained from the UK National Research Ethics Services and patients  
177 provided written informed consent.

178

## 179 **2.4 Image analysis**

180 In the phantom study, SNR was calculated for single spin-echo acquisitions. For each pixel,  
181 the SNR was calculated as

$$SNR = C(N) * \frac{Signal}{SD_{noise}}, \quad (1)$$

182

183 using the signal standard deviation in a  $50 \times 50$  pixel background region-of-interest (without  
184 visible artifacts, e.g. ghosting/Gibbs ringing) as a noise reference ( $SD_{noise}$ )<sup>30</sup>.  $C(N)$  is the SNR  
185 correction factor based on the number of coil channels as described by Gilbert<sup>31</sup>, which  
186 gives 0.695 for the 4-channel coil and 0.703 for the 10-channel coil. The temporal stability of  
187 the two coils was compared using the tSNR, calculated based on the pixel-wise signal mean  
188 and standard deviation of the 6 consecutively acquired slices.

189

190 In the *in vivo* study, wall/lumen contrast-to-noise ratio (CNR) for the healthy volunteers was  
191 estimated as the SNR difference between the carotid vessel wall and its lumen. Inner and  
192 outer vessel wall boundaries were segmented following published procedures<sup>11</sup>. Resulting  
193 CNR values were compared for images acquired using the 10-channel and the 4-channel  
194 coil. For all nine volunteers, results were compared at each of the 14 different echo times.

195

196 Since images were acquired with the 10-channel and 4-channel coil at different times (scan-  
197 rescan during the same session), identical voxel locations could not be assumed for  
198 quantitative statistical analysis. Therefore, we tested the null hypothesis that data were  
199 independent random samples drawn from the same normal distribution, using a  
200 two-sample t-test at 5% significance level.

201

202 Voxel-wise T2 values were estimated in the carotid wall by fitting an exponential decay  
203 curve to the signal intensity of the 14 echoes using a Levenberg-Marquardt nonlinear least  
204 squares algorithm<sup>11</sup>. T2 maps were generated using data acquired with the 10-channel and  
205 the 4-channel coil. Statistical comparisons were performed for the estimated T2 values of  
206 the healthy vessel wall and their standard errors using a two-sample t-test.

207

208 The geometry factor (g-factor) noise amplification metric is used to assess the parallel  
209 imaging performance of a receiver coil when using methods such as SENSE<sup>19</sup> or GRAPPA<sup>32</sup>.  
210 For an acceleration factor of R, the reconstructed SNR ( $SNR_{Rf}$ ) is given by

211

$$SNR_{PI} = \frac{SNR}{g\sqrt{R}} . \quad (2)$$

212 The spatially variant g-factor noise amplification of both coils was estimated for the  
213 (phantom and *in vivo*) turbo-spin-echo acquisitions at retrospectively undersampled  
214 acceleration factors of 2 and 3. For this, the method described by Breuer et al.<sup>33</sup> was used to  
215 calculate the g-factors after application of different GRAPPA kernels, using a calibration  
216 region of  $32 \times 32$  k-space points. Analysis was performed using Matlab R2019a (MathWorks,  
217 Natick, MA).

218

219

## 3. Results

220

### 3.1 Phantom comparisons

221 SNR profiles for both the 4-channel coil and the 10-channel coil in a single-slice spin-echo  
222 acquisition are shown in Figure 2. The 10-channel coil consistently gives an increased SNR  
223 relative to the 4-channel coil, with higher increases closer to the edge of the phantom in the  
224 left-right direction and closer to the centre of the coils in the longitudinal direction. The  
225 mean ( $\pm$  standard deviation of mean) SNR gain along the longitudinal direction shown in  
226 Figure 2b is  $88 \pm 2\%$ , with the largest SNR gain ( $>100\%$ ) at around 5 cm above and below the  
227 center. The tSNR over the same region also increased significantly ( $p < 0.001$ ) for the 10-  
228 channel coil. At a depth of 3 cm, the average tSNR increased by  $80 \pm 8\%$  for the 10-channel  
229 coil (data not shown).

230 *Figure 2: SNR profile of the two coils in a phantom, based on coronal single-slice acquisitions. (a): SNR in the left-*  
231 *right direction, along the line with the highest SNR for each coil. (b): Mean SNR in the longitudinal direction at 3*

232 *cm from the edge of the phantom at both sides (corresponding to the black arrows in (a)), which corresponds to*  
233 *the approximate typical depth of the carotid bifurcation.*

234 Figure 3 shows the estimated g-factor noise amplification in the phantom using both coils  
235 at R = 2 ( Figure 3a) and R = 3 ( Figure 3b). The two top rows show examples of the  
236 reconstructed slices and g-factor distributions in the phantom in a single coronal slice for all  
237 four cases (both coils and both GRAPPA acceleration factors). The bottom row shows the  
238 maximum noise amplification values of all coronal and transverse slices. For coronal  
239 acquisitions, the 10-channel coil consistently achieves a significant ( $p < 0.001$ ) g-factor  
240 reduction of  $47 \pm 7\%$  at R = 2, and of  $58 \pm 3\%$  at R = 3. For transverse acquisitions, the noise  
241 amplification is lower for both coils, probably due to the combination of smaller in-plane  
242 size of the phantom and increased spatial separation of receive channels in transverse  
243 acquisitions. Lower g-factors are visible for the 10-channel coil for some of the off-centre  
244 transverse slices where the 4-channel coil has an increased maximum g-factor. However, no  
245 overall statistically significant difference is observed between the two coils for the  
246 transverse acquisitions.

247 *Figure 3: Estimated g-factor noise amplification in a phantom using the 4-channel and the 10-channel coils, at (a)*  
248 *R = 2 and (b) R = 3. Reconstructions as well as retained SNR (inverse g-factor) maps of a single coronal slice are*  
249 *shown for both coils and at both acceleration factors. The bottom row shows the maximum g-factor in each slice*  
250 *for both the transverse and coronal acquisitions. Note that the maximum g-factor values are shown using a*  
251 *different y-axis scaling in Figure (a) than in Figure (b).*

### 252 **3.2 In vivo comparisons**

253 Figure 4 shows the estimated *in vivo* g-factor noise amplification using both coils at R = 2  
254 (Figure 4a) and R = 3 (Figure 4b) for transverse acquisitions. The 10-channel coil achieves a  
255 small but significant ( $p = 0.003$ ) g-factor reduction of  $3 \pm 3\%$  at R = 2, and of  $19 \pm 9\%$  at R = 3  
256 ( $p < 0.001$ ).

257 *Figure 4: in vivo estimated g-factor noise amplification using the 4-channel and the 10-channel coils, at (a) R = 2*  
258 *and (b) R = 3. All data is shown for transverse acquisitions. The top two rows show reconstructions as well as*  
259 *retained SNR (inverse g-factor) maps of a single transverse slice for both coils and at both acceleration factors.*  
260 *The bottom row shows the maximum transverse g-factor in each slice. Note that the maximum g-factor values*  
261 *are shown using a different y-axis scaling in Figure (a) than in Figure (b).*

262 DANTE-MESE images at different echo times are shown in Figure 5 using both the 4-channel  
263 and the 10-channel carotid coil. The internal and external carotid arteries are clearly visible  
264 on the images from both coils at short echo times. Increased CNR using the 10-channel coil  
265 versus the 4-channel coil noticeably improves vessel visibility at longer echo times. The  
266 mean CNR between the vessel walls and the lumen are shown in Figure 5c for all subjects  
267 using both coils. The CNR is consistently significantly higher ( $+62 \pm 11\%$  for the 14 echo  
268 times;  $p < 10^{-5}$  at each individual echo time) when using the 10-channel coil, with the  
269 largest relative increases (up to  $+82\%$ ) at short echo times. In total,  $\sim 14,000$  vessel wall  
270 voxels were identified and compared across the 9 healthy volunteers.

271  
272 The T2 value of healthy carotid wall tissue at 3T calculated for the 9 volunteers using the 14  
273 echo times was  $65.9 \pm 14.1$  ms (mean + SD) using the 4-channel coil, and  $63.1 \pm 13.6$  ms  
274 using the 10-channel coil. The standard error of the T2 estimates was  $6.6 \pm 4.5$  ms using  
275 the 4-channel coil, and  $5.0 \pm 3.3$  ms using the 10-channel coil. The statistical distributions  
276 of data acquired with the 4-channel coil and 10-channel coil were significantly different for  
277 T2 values and standard errors (all tests rejected the null hypothesis with  $p < 10^{-5}$ ). The  
278 improved SNR obtained with the 10-channel coil resulted in an average reduction of 24% on  
279 the standard errors of the estimated T2 values.

280 *Figure 5: DANTE-MESE scans of nine healthy volunteers using both coils. All data is shown to the same greyscale.*  
281 *(a-b) Close-ups near the carotid bifurcation of a single volunteer at four different echo times using (a) the 4-*

282 channel coil and **(b)** the 10-channel coil. **(c)** Mean carotid wall/lumen CNR results of both coils across the nine  
283 volunteers.

284 Figure 6 shows typical examples of DANTE-FSE T1-weighted images of the carotid arteries  
285 near the carotid bifurcation in two patients with atherosclerotic carotid artery disease,  
286 acquired using the 10-channel coil.

287 *Figure 6: Consecutive DANTE-FSE T1-weighted slice segments showing the carotid bifurcations in two patients*  
288 *with atherosclerotic carotid artery disease, acquired using the new 10-channel coil. (a-b) Subject 1, left- and right-*  
289 *hand sides; (c) subject 2, right-hand side.*

## 290 4. Discussion

291 In this study, a novel 10-channel phased-array coil design for carotid imaging at 3 Tesla was  
292 compared to a commercial 4-channel coil design. Data acquired in a phantom and in healthy  
293 volunteers were used to compare the SNR, vessel wall-lumen CNR, and parallel imaging  
294 noise amplification values of both coils. Additional patient data were included to show the  
295 typical image quality and carotid plaque details that can be achieved by the proposed coil.

296  
297 The phantom results in Figure 2 Figure 3 show a significant increase in SNR ( $88 \pm 2\%$ ) when  
298 using the proposed 10-channel coil compared to the commercial 4-channel coil, as well as a  
299 reduction in parallel imaging noise amplification for coronal acquisitions. Although the  
300 phantom data did not obtain a statistically significant reduction in noise amplification for  
301 transverse acquisitions, the *in vivo* results in Figure 4 did achieve significant reductions for  
302 transverse acquisitions.

303  
304 The increase in SNR was largest close to the coils but consistently present throughout the  
305 phantom. In patients, the large increase in SNR near the edge of the neck is beneficial for

306 imaging the relatively superficial carotid bifurcations. The consistent SNR improvement at  
307 greater depths indicates that this benefit can be maintained for patients with thicker necks  
308 or with atypical vasculature. Longitudinally, a mean increase in SNR of 88% was achieved  
309 over a distance of 10 cm in the phantom. Since the longitudinal position of the carotid  
310 bifurcation can vary by several centimetres between patients, this longitudinal consistency  
311 makes the SNR gain in the 10-channel coil beneficial to large groups of patients without  
312 requiring adjustments in coil positioning during a scan session. Away from the carotid  
313 bifurcation, the longitudinal SNR improvement, as demonstrated by the phantom data,  
314 provides improved coverage over a larger part of the carotid circulation.

315

316 In 2016, Hu et al.<sup>23</sup> proposed an 8-channel carotid coil design, which they compared to the  
317 same commercial 4-channel coil design that is used for comparison in this paper. The  
318 proposed 10-channel coil obtained a 88% SNR increase in the phantom, consistently larger  
319 than the ~40% increase achieved by Hu et al.<sup>23</sup>, slightly larger than the 70% SNR increase  
320 presented earlier for an 8-channel carotid coil relative to a custom-built 4-channel coil<sup>15</sup>,  
321 and similar to the SNR increase found when using the 16-channel coil proposed by Tate et  
322 al.<sup>26</sup>, which requires a larger number of receive channels and provides reduced positioning  
323 flexibility.

324

325 The lower g-factors when using the 10-channel coil (Figure 3) make it possible to visualize  
326 the carotid arteries at increased parallel imaging acceleration factors with limited noise  
327 amplification. This is especially important for cases when high-resolution data are acquired,  
328 such as for volumetric plaque quantification, or when multiple datasets with different  
329 contrasts need to be acquired for tissue characterisation, which would without additional

330 acceleration require prohibitively long scan times. In practice, the minimal g-factor noise  
331 amplification using the proposed 10-channel design at R=2 means that data can be acquired  
332 with a substantial scan time reduction while maintaining clinical image quality. The large g-  
333 factor reduction in the longitudinal direction can be explained based on the difference in  
334 longitudinal position of some of the individual channels in the 10-channel coil, while all  
335 channels in the 4-channel coil are positioned in approximately the same longitudinal  
336 location.

337

338 The data acquired from healthy volunteers using the 10-channel coil and the 4-channel coil  
339 (Figure 5) show significant SNR and carotid wall-to-lumen CNR improvements which are  
340 consistent with the phantom studies. The mean CNR increase of +62% (up to +82% for the  
341 shortest TE) at the bifurcation is consistently larger than that achieved by the 6-, 8-, and 30-  
342 channel coil designs reported by Zhang et al.<sup>20</sup>, who measured their CNR increase relative to  
343 the same 4-channel coil used in this study, and with similar FOV and voxel size. <sup>26</sup>Compared  
344 to the 4-channel coil, the increased CNR obtained using the 10-channel coil provided an  
345 improved vessel visibility around the carotid bifurcation at all echo times in the DANTE-  
346 MESE acquisitions, and a reduced error on the estimated T2 values of the healthy vessel wall  
347 across the 9 healthy volunteers.

348

349 In the patient data, as shown in Figure 6, the high CNR of the T1-weighted images provided  
350 by the 10-channel coil produced clearly visible and clinically useful vessel and plaque  
351 delineation over the length of the carotid bifurcation. The carotid bifurcation was clearly  
352 delineated for all 12 patients that were scanned using the 10-channel coil array, despite  
353 differences in longitudinal location of the bifurcations, benefiting from the increased



354 longitudinal coverage of this proposed coil design (Figure 2b). In compliance with the  
355 approved ethics agreement, additional patient data using the 4-channel coil were not  
356 acquired and are therefore not available for comparison in this study.

357

358 Zhang et al. compared 4-, 6-, 8-, and 30-channel coils, and found that designs with fewer  
359 channels achieved higher SNR coverage than the 30-channel coil, while the 30-channel coil  
360 facilitated higher parallel imaging acceleration factors<sup>20</sup>. The 10-channel coil configuration  
361 proposed in this study offers reduced g-factor noise amplification in accelerated coronal  
362 acquisitions, while achieving increased SNR coverage compared to the commercial 4-  
363 channel coil and two previously presented 8-channel coils<sup>15,23</sup> as well as improved CNR  
364 performance compared to the 6-, 8-, and 30-channel coil designs<sup>20</sup>. The proposed design  
365 can enable accurate imaging of the carotid bifurcation at high resolutions using multiple  
366 contrasts or quantitative mapping for plaque characterization within shorter scan times.

367

368

## 5. Conclusion

369 A novel 10-channel phased-array coil configuration achieved better visualization of the  
370 carotid bifurcation, with significantly increased SNR and CNR and decreased g-factor noise  
371 amplification. This design can facilitate improved characterization of atherosclerotic plaques  
372 in the carotid arteries within shorter scan times.

373

## 374 Acknowledgements

375 We thank Peter Manley and Alison Fletcher for making it possible to acquire phantom data  
376 at the Acute Vascular Imaging Centre (AVIC) despite restrictions due to COVID-19, and

377 Aaron T. Hess for valuable discussions during the preparation of this manuscript. The  
378 Wellcome Centre for Integrative Neuroimaging is supported by core funding from the  
379 Wellcome Trust (203139/Z/16/Z). MdB acknowledges studentship support from Siemens  
380 Healthineers and the Dunhill Medical Trust. PJ thanks the Dunhill Medical Trust and the  
381 NIHR Oxford Biomedical Research Centre for support. LB acknowledges support from the  
382 British Heart Foundation (PG/15/74/31747).

383

384

## References

- 385 1. Masaryk TJ, Ross JS, Modic MT, Lenz GW, Haacke EM. Carotid Bifurcation: MR  
386 Imaging. *Neuroradiology*. 1988;166:461-466.
- 387 2. Redgrave JN, Gallagher P, Lovett JK, Rothwell PM. Critical cap thickness and rupture in  
388 symptomatic carotid plaques: The oxford plaque study. *Stroke*. 2008;39(6):1722-  
389 1729. doi:10.1161/STROKEAHA.107.507988
- 390 3. Balu N, Chu B, Hatsukami TS, Yuan C, Yarnykh VL. Comparison between 2D and 3D  
391 high-resolution black-blood techniques for carotid artery wall imaging in clinically  
392 significant atherosclerosis. *Journal of Magnetic Resonance Imaging*. 2008;27(4):918-  
393 924. doi:10.1002/jmri.21282
- 394 4. Van Lammeren GW, Reichmann BL, Moll FL, et al. Atherosclerotic plaque vulnerability  
395 as an explanation for the increased risk of stroke in elderly undergoing carotid artery  
396 stenting. *Stroke*. 2011;42(9):2550-2555. doi:10.1161/STROKEAHA.110.607382
- 397 5. Lindsay AC, Biasioli L, Knight S, et al. Non-invasive imaging of carotid arterial  
398 restenosis using 3T cardiovascular magnetic resonance. *Journal of Cardiovascular  
399 Magnetic Resonance*. 2014;16(1):1-8. doi:10.1186/1532-429X-16-5
- 400 6. Underhill HR, Hatsukami TS, Fayad ZA, Fuster V, Yuan C. MRI of carotid  
401 atherosclerosis: Clinical implications and future directions. *Nat Rev Cardiol*.  
402 2010;7(3):165-173. doi:10.1038/nrcardio.2009.246
- 403 7. Alkhalil M, Biasioli L, Akbar N, et al. T2 mapping MRI technique quantifies carotid  
404 plaque lipid, and its depletion after statin initiation, following acute myocardial  
405 infarction. *Atherosclerosis*. 2018;279(August):100-106.  
406 doi:10.1016/j.atherosclerosis.2018.08.033
- 407 8. Cai J ming, Hatsukami TS, Ferguson MS, Small R, Polissar NL, Yuan C. Classification of  
408 Human Carotid Atherosclerotic Lesions With In Vivo Multicontrast Magnetic  
409 Resonance Imaging. *Circulation*. Published online 2002:1368-1373.  
410 doi:10.1161/01.CIR.0000028591.44554.F9

- 411 9. Zhang X, Tong F, Li CX, et al. A fast multiparameter MRI approach for acute stroke  
412 assessment on a 3T clinical scanner: preliminary results in a non-human primate  
413 model with transient ischemic occlusion. *Quant Imaging Med Surg*. 2014;4(2):112-  
414 122. doi:10.3978/j.issn.2223-4292.2014.04.06
- 415 10. Kerwin WS, Miller Z, Yuan C. Imaging of the high-risk carotid plaque: magnetic  
416 resonance imaging. *Semin Vasc Surg*. 2017;30(1):54-61.  
417 doi:10.1053/j.semvascsurg.2017.04.009
- 418 11. Biasioli L, Lindsay AC, Chai JT, Choudhury RP, Robson MD. In-vivo quantitative T2  
419 mapping of carotid arteries in atherosclerotic patients: Segmentation and T2  
420 measurement of plaque components. *Journal of Cardiovascular Magnetic Resonance*.  
421 2013;15(1):1-9. doi:10.1186/1532-429X-15-69
- 422 12. Fisher M, Paganini-Hill A, Martin A, et al. Carotid plaque pathology: Thrombosis,  
423 ulceration, and stroke pathogenesis. *Stroke*. 2005;36(2):253-257.  
424 doi:10.1161/01.STR.0000152336.71224.21
- 425 13. Chai JT, Biasioli L, Li L, et al. Quantification of Lipid-Rich Core in Carotid  
426 Atherosclerosis Using Magnetic Resonance T2 Mapping: Relation to Clinical  
427 Presentation. *JACC Cardiovasc Imaging*. 2017;10(7):747-756.  
428 doi:10.1016/j.jcmg.2016.06.013
- 429 14. Alkhalil M, Biasioli L, Chai JT, et al. Quantification of carotid plaque lipid content with  
430 magnetic resonance T2 mapping in patients undergoing carotid endarterectomy. *PLoS*  
431 *One*. 2017;12(7):1-12. doi:10.1371/journal.pone.0181668
- 432 15. Balu N, Yarnykh VL, Scholnick J, Chu B, Yuan C, Hayes C. Improvements in carotid  
433 plaque imaging using a new eight-element phased array coil at 3T. *Journal of*  
434 *Magnetic Resonance Imaging*. 2009;30(5):1209-1214. doi:10.1002/jmri.21890
- 435 16. Ouhlous M, Moelker A, Flick HJ, et al. Quadrature coil design for high-resolution  
436 carotid artery imaging scores better than a dual phased-array coil design with the  
437 same volume coverage. *Journal of Magnetic Resonance Imaging*. 2007;25(5):1079-  
438 1084. doi:10.1002/jmri.20894
- 439 17. Hadley JR, Roberts JA, Goodrich KC, Buswell HR, Parker DL. Relative RF coil  
440 performance in carotid imaging. *Magn Reson Imaging*. 2005;23(5):629-639.  
441 doi:10.1016/j.mri.2005.04.009
- 442 18. Deshmane A, Gulani V, Griswold MA, Seiberlich N. Parallel MR imaging. *Journal of*  
443 *Magnetic Resonance Imaging*. 2012;36(1):55-72. doi:10.1002/jmri.23639
- 444 19. Pruessmann KP, Weiger M, Scheidegger MB, Boesiger P. SENSE: Sensitivity encoding  
445 for fast MRI. *Magn Reson Med*. 1999;42(5):952-962. doi:10.1002/(SICI)1522-  
446 2594(199911)42:5<952::AID-MRM16>3.0.CO;2-S
- 447 20. Zhang Q, Coolen BF, van den Berg S, et al. Comparison of four MR carotid surface  
448 coils at 3T. *PLoS One*. 2019;14(3):1-16. doi:10.1371/journal.pone.0213107
- 449 21. Frost R, Biasioli L, Li L, et al. Navigator-based reacquisition and estimation of motion-  
450 corrupted data: Application to multi-echo spin echo for carotid wall MRI. *Magn Reson*  
451 *Med*. 2020;83(6):2026-2041. doi:10.1002/mrm.28063

- 452 22. Hayes CE, Mathis CM, Yuan C. Surface coil phased arrays for high-resolution imaging  
453 of the carotid arteries. *Journal of Magnetic Resonance Imaging*. 1996;6(1):109-112.  
454 doi:10.1002/jmri.1880060121
- 455 23. Hu X, Zhang L, Zhang X, et al. An 8-channel RF coil array for carotid artery MR imaging  
456 in humans at 3 T. *Med Phys*. 2016;43(4):1897-1906. doi:10.1118/1.4944500
- 457 24. Zhang B, Cloos MA, Yang J, Nguyen TD, Brown R. Ultra-flexible 3T HIC receive array  
458 for carotid imaging. *Proceedings of the 2019 21st International Conference on*  
459 *Electromagnetics in Advanced Applications, ICEAA 2019*. 2019;(1):459-464.  
460 doi:10.1109/ICEAA.2019.8878950
- 461 25. Zhang D, Rahmat-Samii Y. A novel flexible electrotexile 3T MRI RF coil array for  
462 carotid artery imaging: Design, characterization, and prototyping. *IEEE Trans*  
463 *Antennas Propag*. 2019;67(8):5115-5125. doi:10.1109/TAP.2019.2891700
- 464 26. Tate Q, Kim SE, Treiman G, Parker DL, Hadley JR. Increased vessel depiction of the  
465 carotid bifurcation with a specialized 16-channel phased array coil at 3T. *Magn Reson*  
466 *Med*. 2013;69(5):1486-1493. doi:10.1002/mrm.24380
- 467 27. Koning W, Bluemink JJ, Langenhuizen EAJ, et al. High-resolution MRI of the carotid  
468 arteries using a leaky waveguide transmitter and a high-density receive array at 7 T.  
469 *Magn Reson Med*. 2013;69(4):1186-1193. doi:10.1002/mrm.24345
- 470 28. Li L, Chai JT, Biasioli L, et al. Black-blood multicontrast imaging of carotid arteries  
471 with DANTE-prepared 2D and 3D MR imaging. *Radiology*. 2014;273(2):560-569.  
472 doi:10.1148/radiol.14131717
- 473 29. Li L, Miller KL, Jezzard P. DANTE-prepared pulse trains: A novel approach to motion-  
474 sensitized and motion-suppressed quantitative magnetic resonance imaging. *Magn*  
475 *Reson Med*. 2012;68(5):1423-1438. doi:10.1002/mrm.24142
- 476 30. Kaufman L, Kramer DM, Crooks LE, Ortendahl DA. Measuring signal-to-noise ratios in  
477 MR imaging. *Radiology*. 1989;173(1):265-267. doi:10.1148/radiology.173.1.2781018
- 478 31. Gilbert G. Measurement of signal-to-noise ratios in sum-of-squares MR images.  
479 *Journal of Magnetic Resonance Imaging*. 2007;26(6):1678. doi:10.1002/jmri.21171
- 480 32. Griswold MA, Jakob PM, Heidemann RM, et al. Generalized Autocalibrating Partially  
481 Parallel Acquisitions (GRAPPA). *Magn Reson Med*. 2002;47(6):1202-1210.  
482 doi:10.1002/mrm.10171
- 483 33. Breuer FA, Kannengiesser SAR, Blaimer M, Seiberlich N, Jakob PM, Griswold MA.  
484 General formulation for quantitative G-factor calculation in GRAPPA reconstructions.  
485 *Magn Reson Med*. 2009;62(3):739-746. doi:10.1002/mrm.22066
- 486

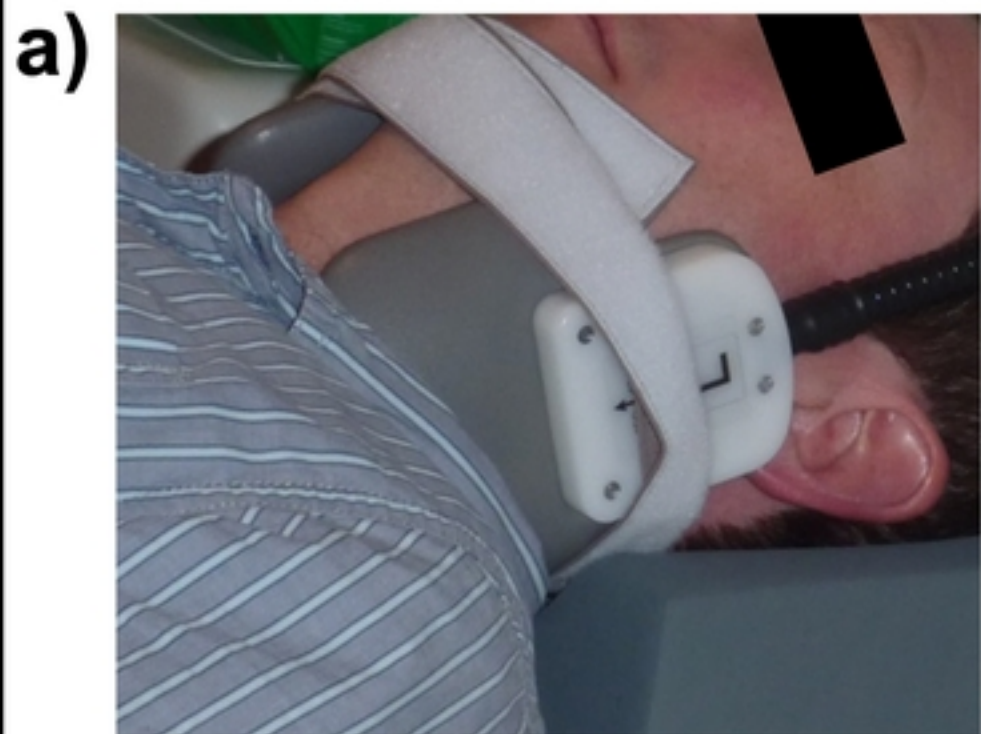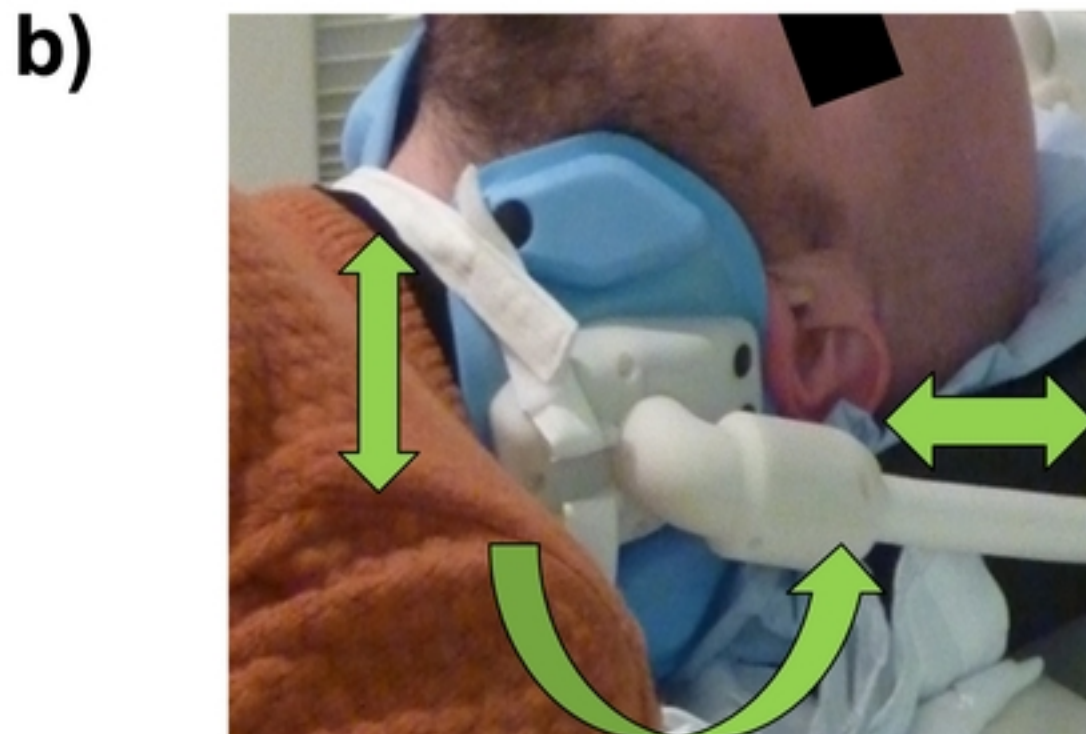

104 mm (A ↔ P)

130 mm (A ↔ P)

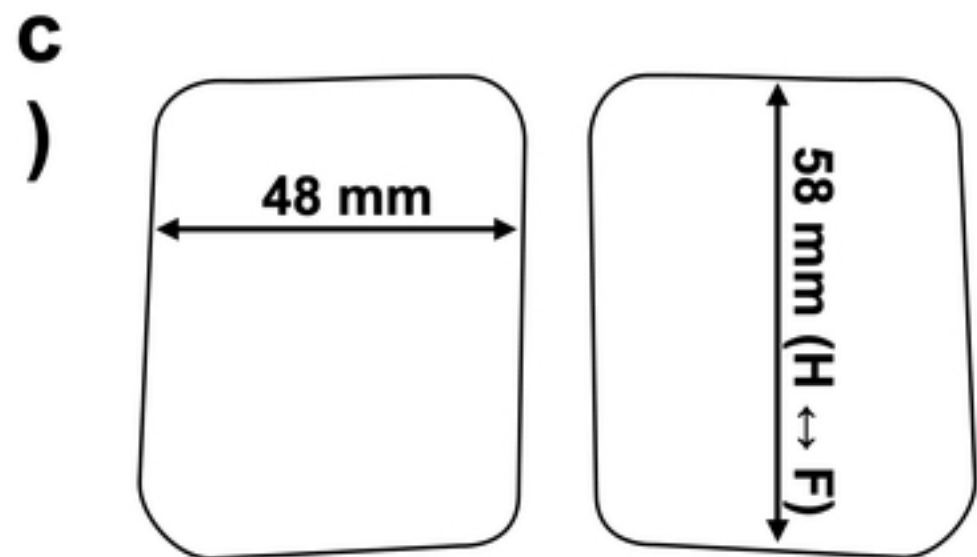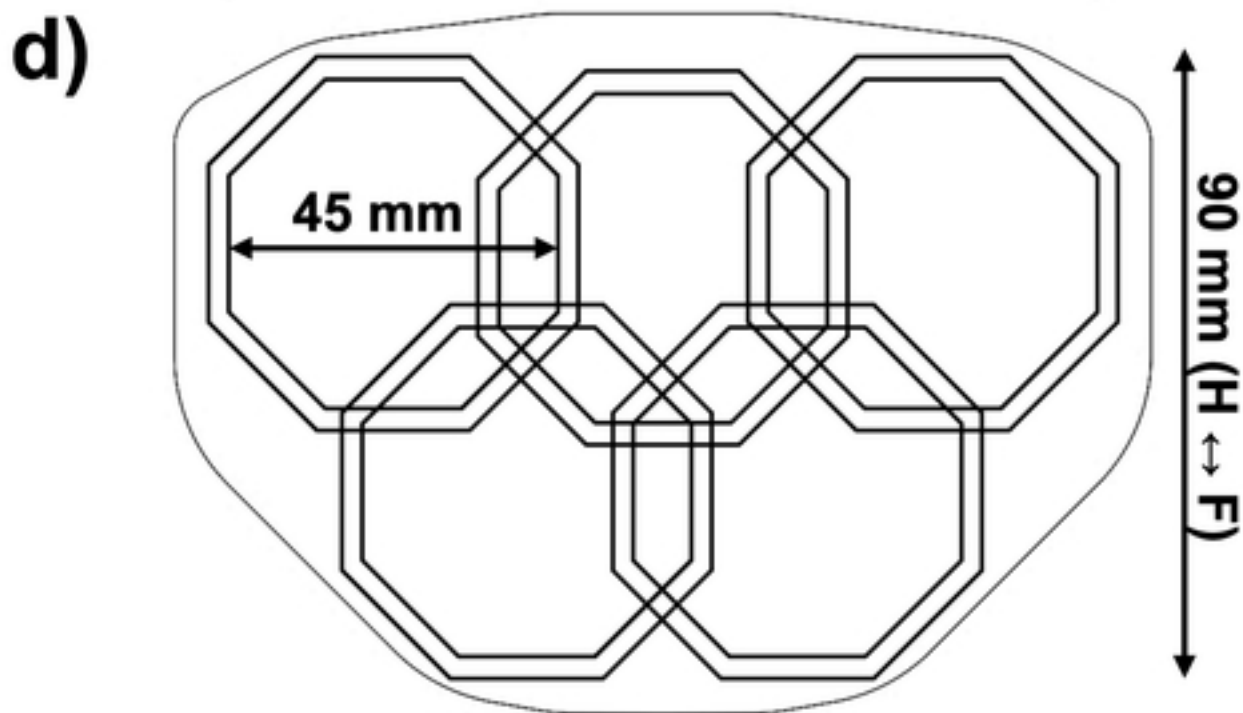

Figure 1



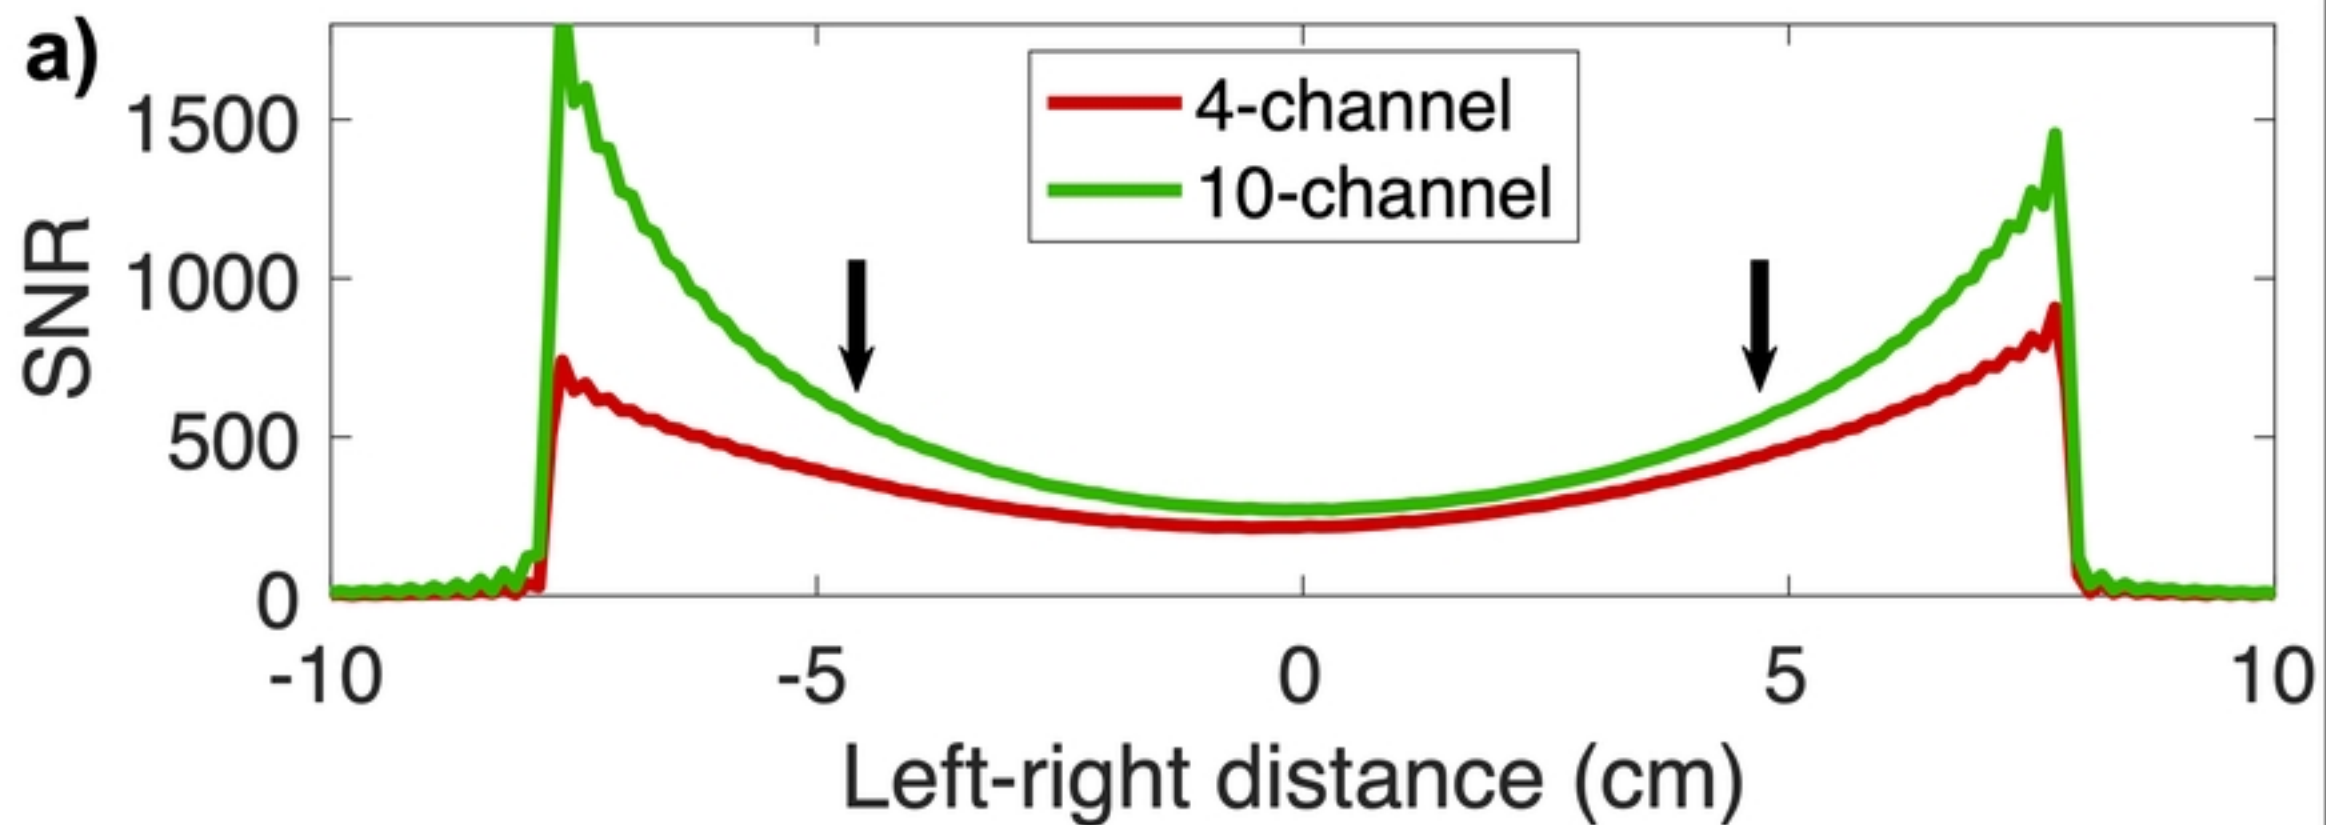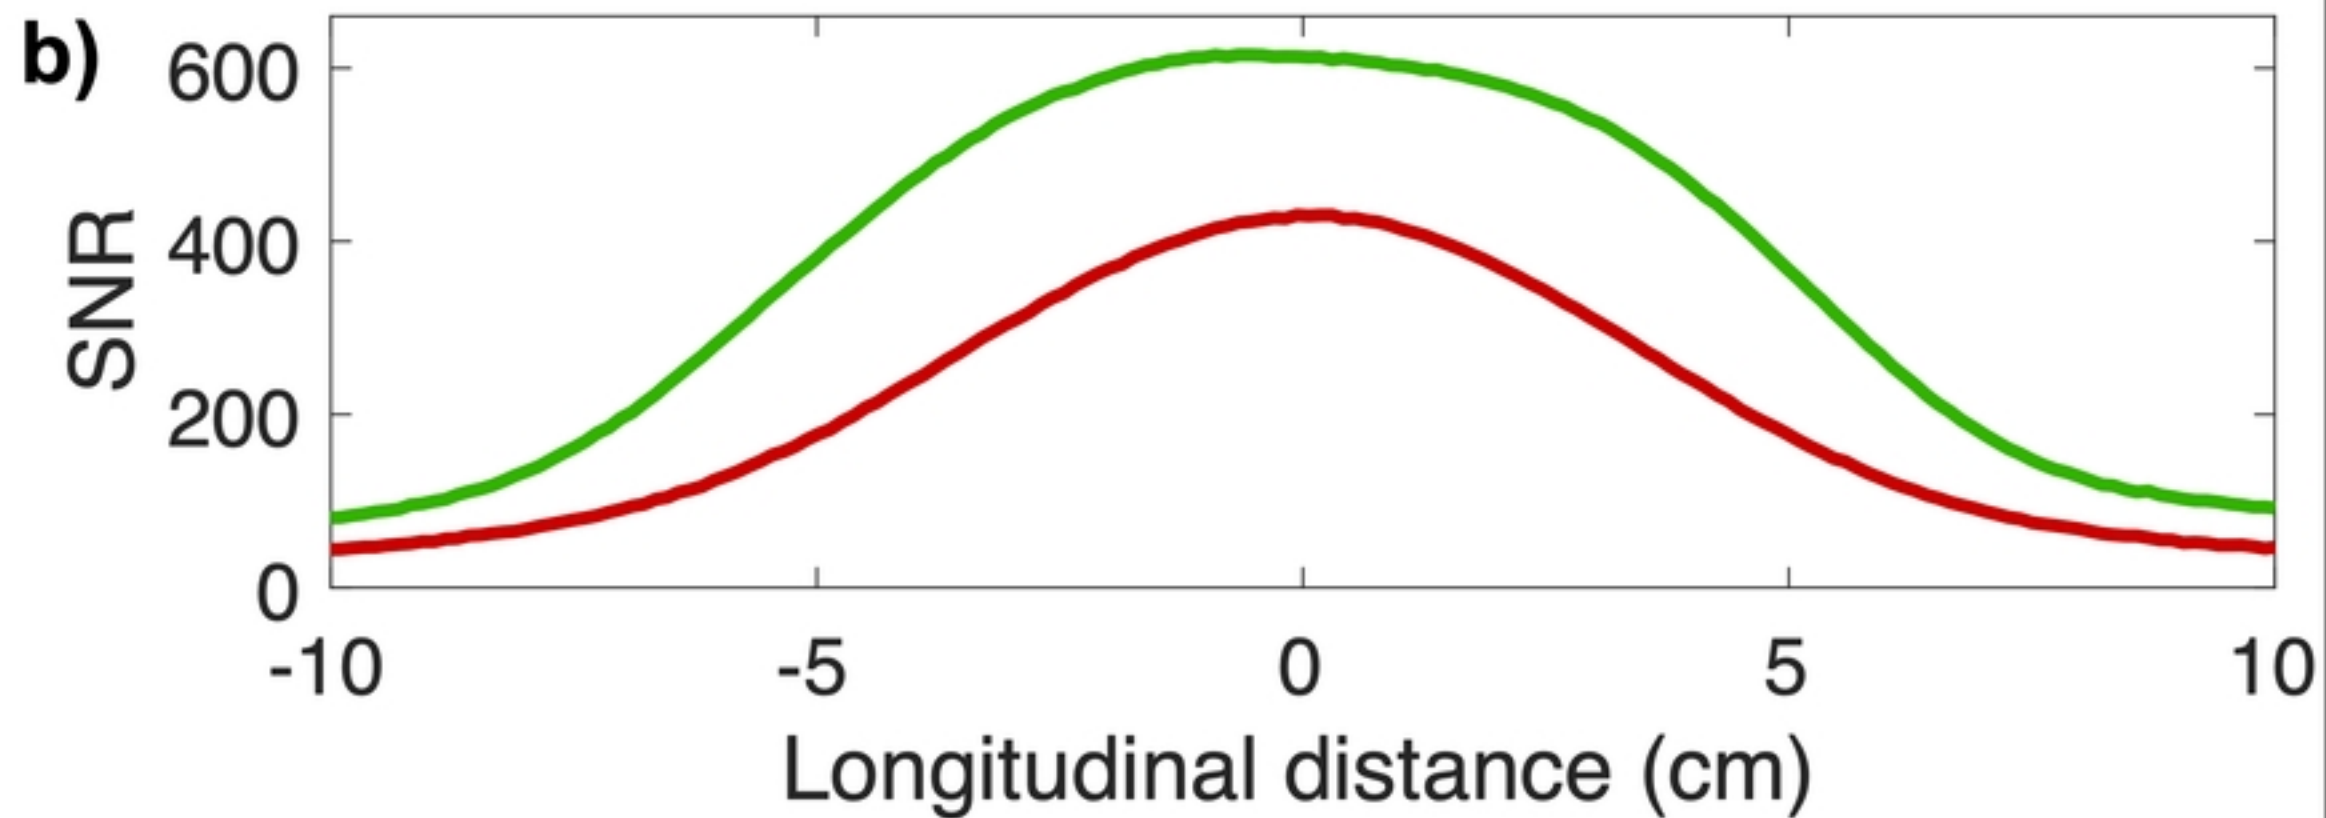

Figure 2

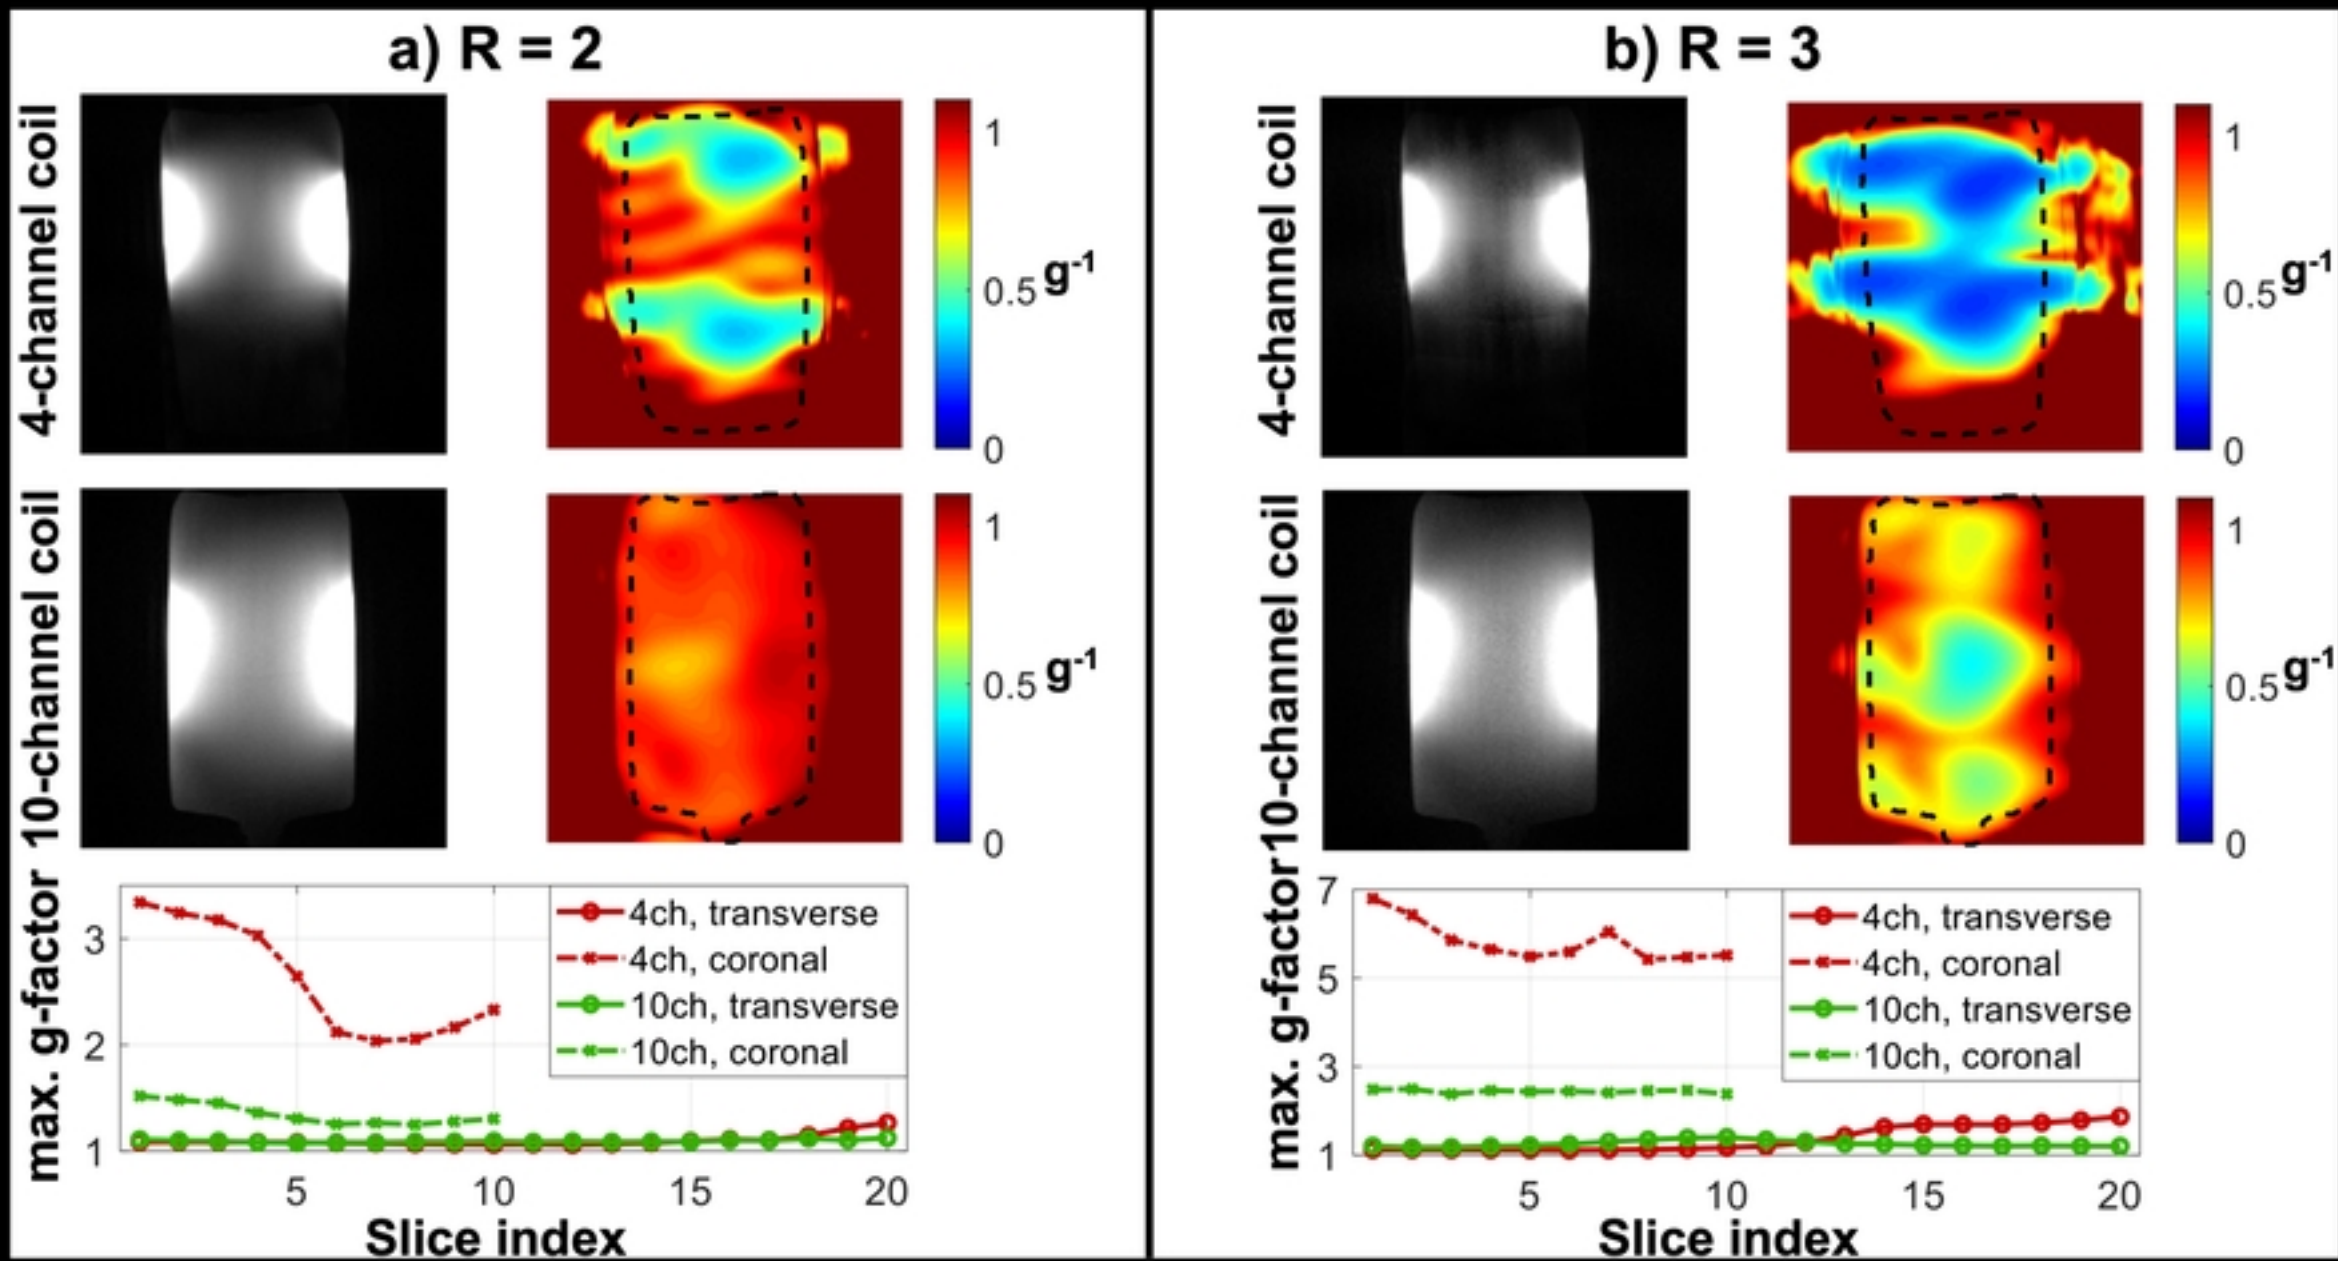

Figure 3

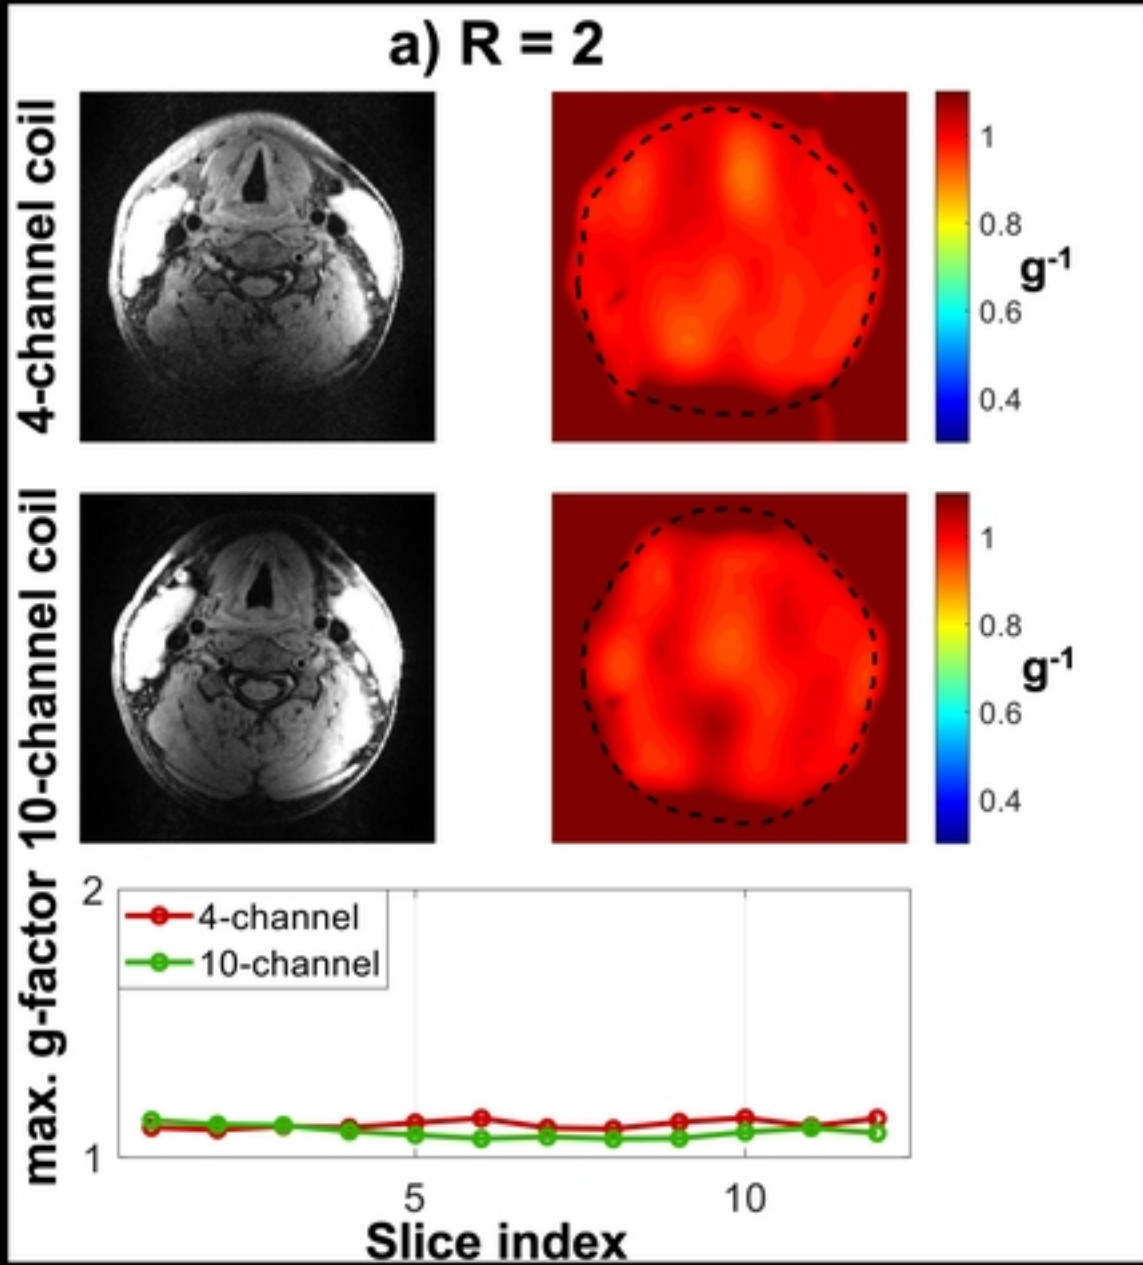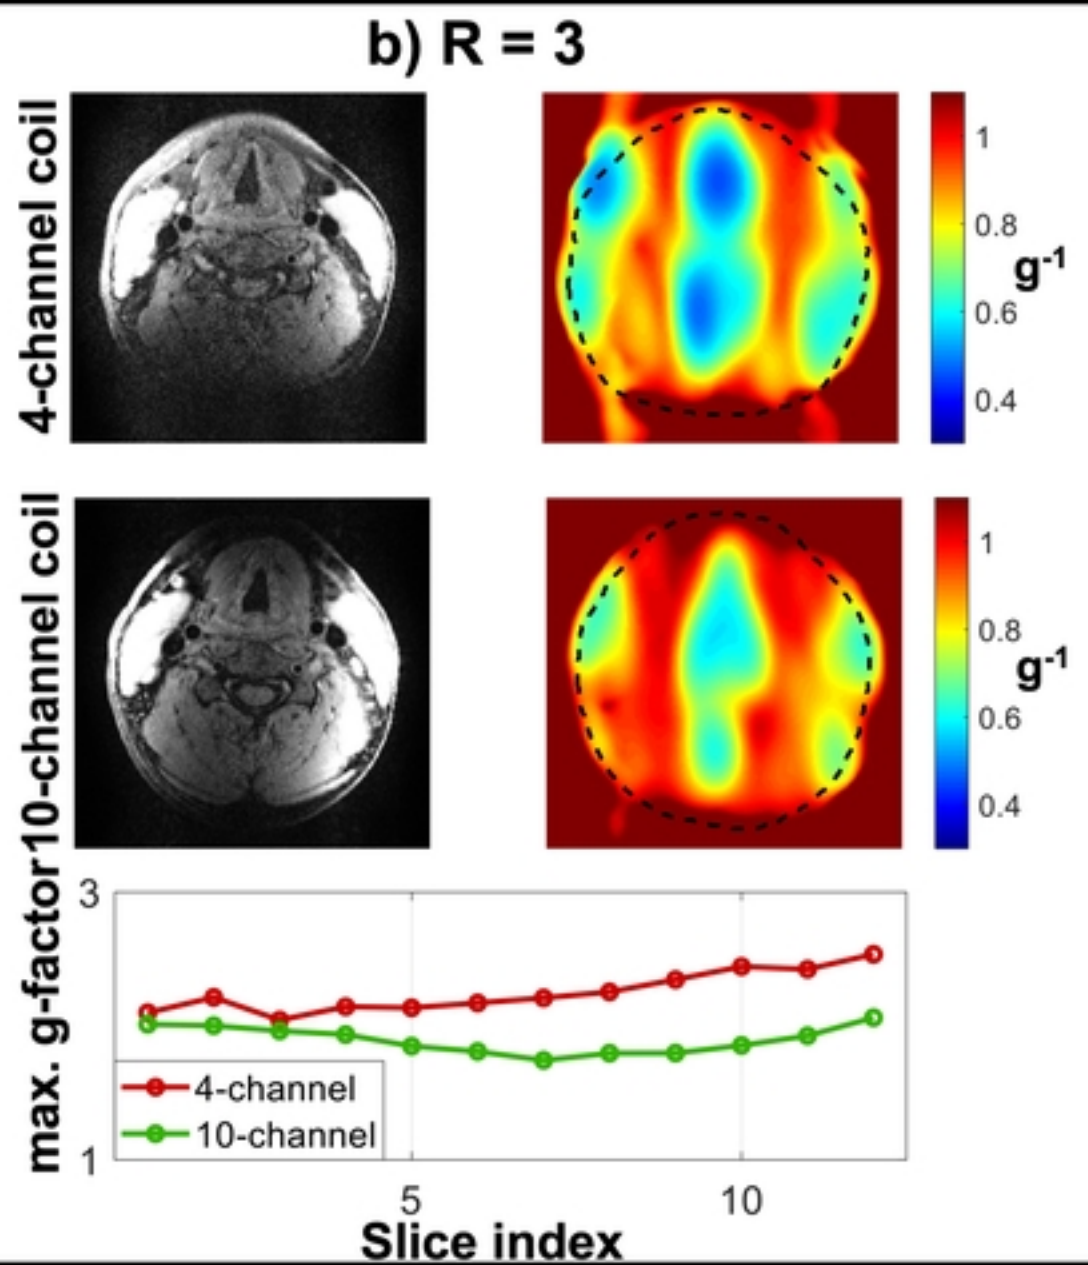

Figure 4



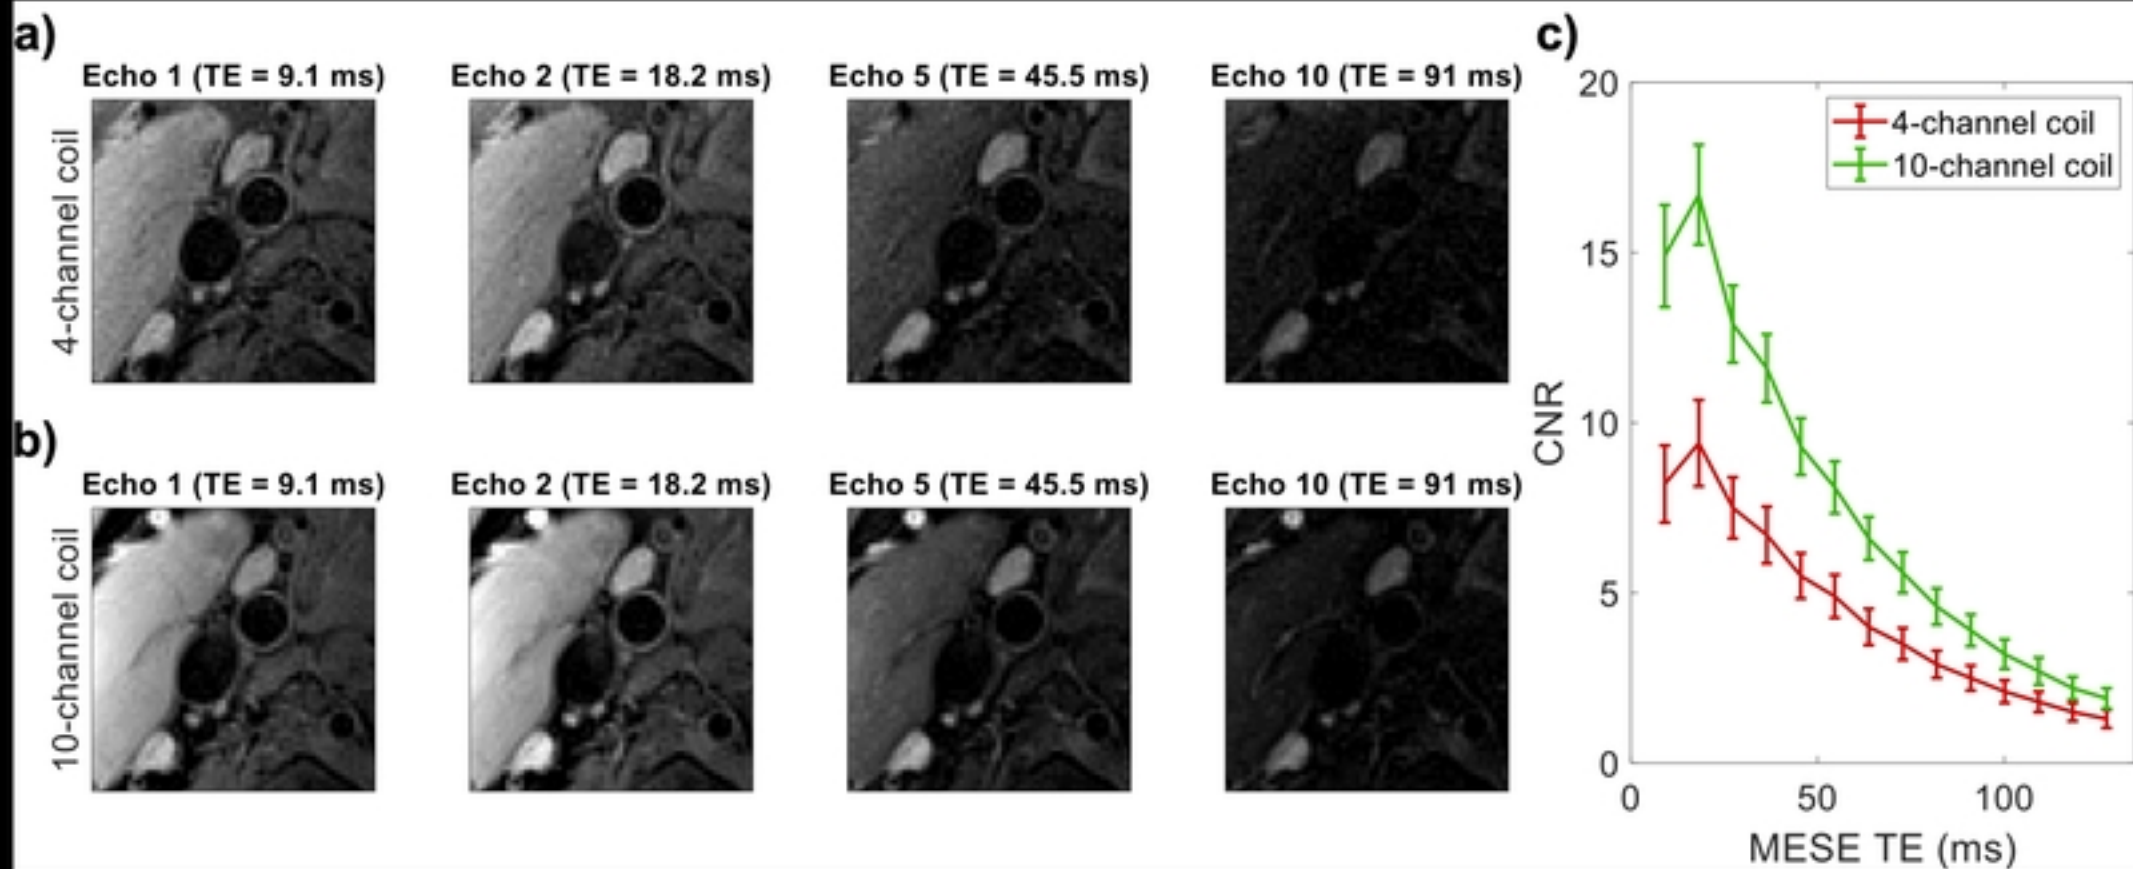

Figure 5

a) sub1-R

b) sub1-L

c) sub2-L

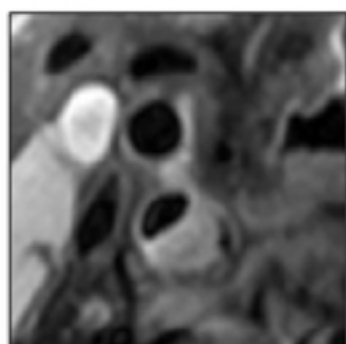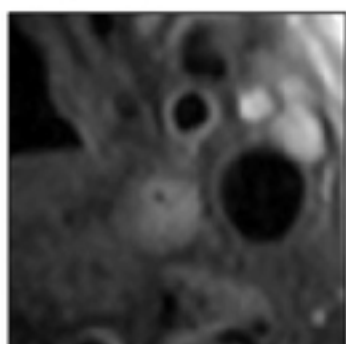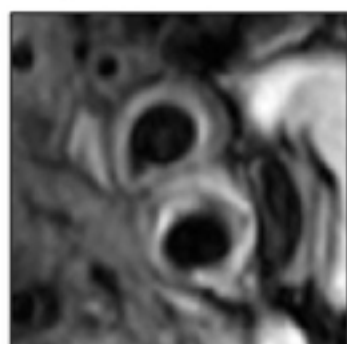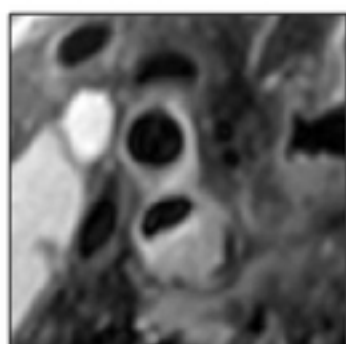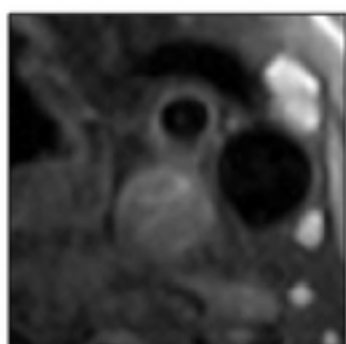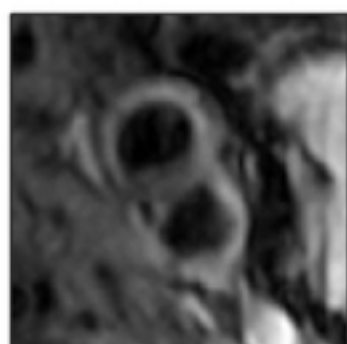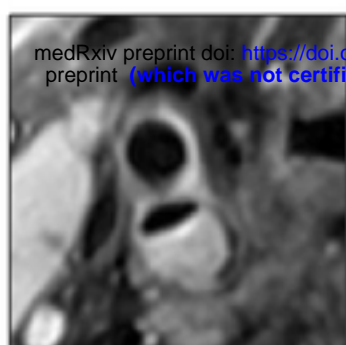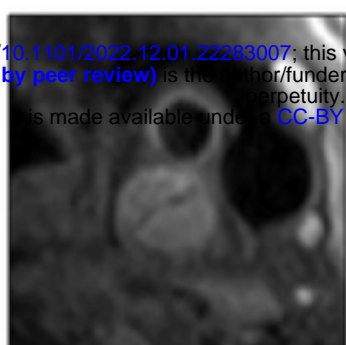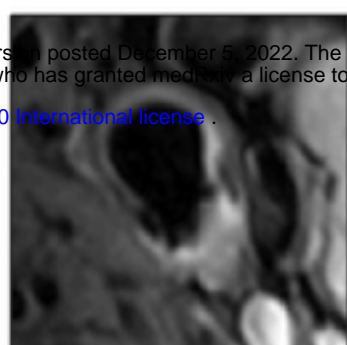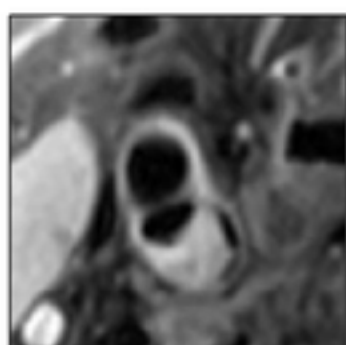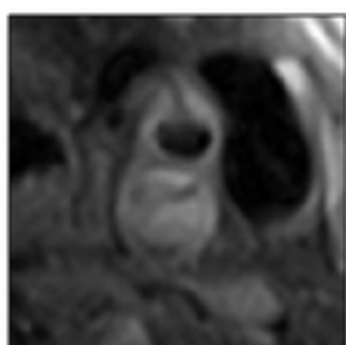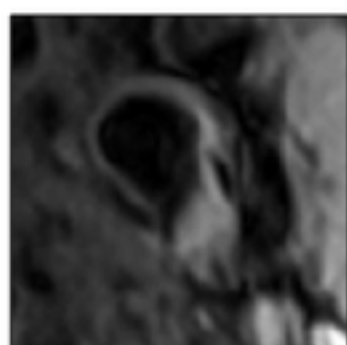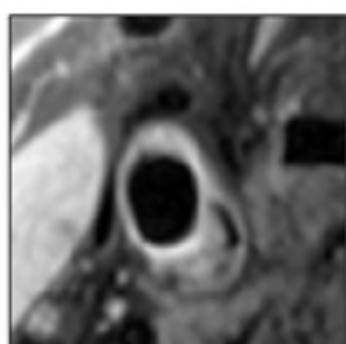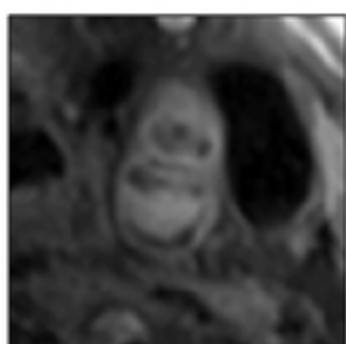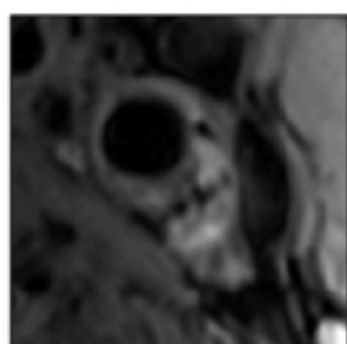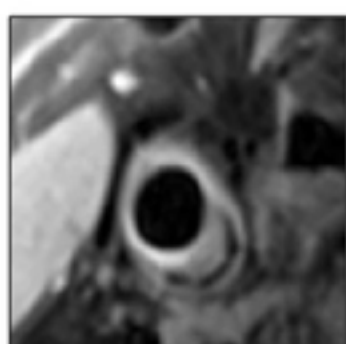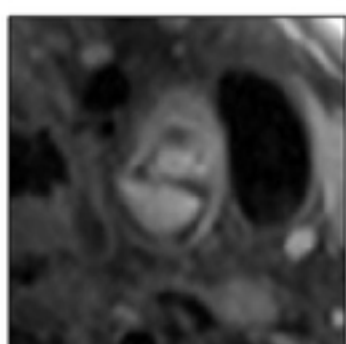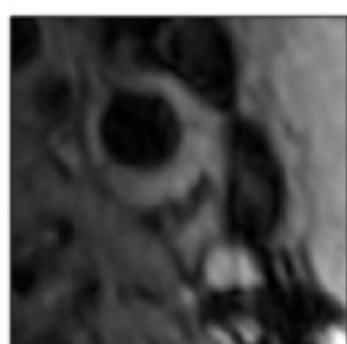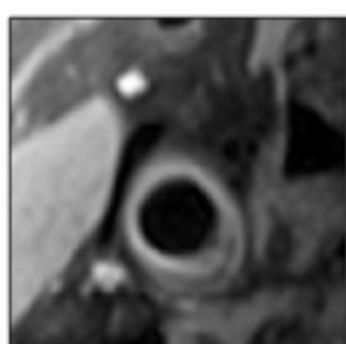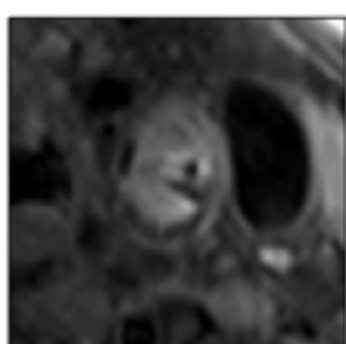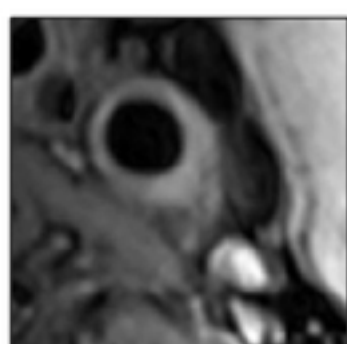

medRxiv preprint doi: <https://doi.org/10.1101/2022.12.01.22263007>; this version posted December 5, 2022. The copyright holder for this preprint (which was not certified by peer review) is the author/funder, who has granted medRxiv a license to display the preprint in perpetuity. It is made available under a [CC-BY 4.0 International license](https://creativecommons.org/licenses/by/4.0/).

Head →

← Body

Figure 6
